# Supplementary material for: Reactions of coordinated hydroxymethylphosphines with NH-functional amines: the phosphorus lone pair is crucial for the phosphorus Mannich reaction
Source: Royal Society of Chemistry journal article supplement (doi:10.1039/c1dt10586h), 2011-01-01
Supplement: c1dt10586h.pdf [file c1dt10586h.pdf]

## Electronic Supplementary Information

# Reactions of Coordinated Hydroxymethylphosphines with NH- Functional Amines: The Phosphorus Lone Pair is Crucial for the Phosphorus Mannich Reaction

*Charles D. Swor, Kyle R. Hanson, Lev N. Zakharov, and David R. Tyler\**

Department of Chemistry, University of Oregon, Eugene, Oregon 97403

Email: [dtyler@uoregon.edu](mailto:dtyler@uoregon.edu)

### Contents:

|                                                                                 |     |
|---------------------------------------------------------------------------------|-----|
| NMR spectra of <i>trans</i> -Fe(DHMPE) <sub>2</sub> Cl <sub>2</sub>             | S2  |
| NMR spectra of DHMPE·2BH <sub>3</sub>                                           | S4  |
| NMR Spectra of Mannich reaction kinetic studies                                 | S6  |
| ESI-mass spectrum of Fe(DHMPE) <sub>2</sub> Cl <sub>2</sub> + BuNH <sub>2</sub> | S10 |
| ESI-mass spectrum of [Fe(DHMPE) <sub>3</sub> ] <sup>2+</sup>                    | S11 |
| ESI-MS zoom scan of [Fe(DHMPE) <sub>3</sub> ] <sup>2+</sup> (7xx amu)           | S11 |
| Crystallographic data for <i>trans</i> -Fe(DHMPE) <sub>2</sub> Cl <sub>2</sub>  | S12 |
| Crystallographic data for DHMPE·2BH <sub>3</sub>                                | S20 |

$^1\text{H}$  NMR Spectrum of *trans*-Fe(DHMPE) $_2\text{Cl}_2$  (DMSO- $d_6$ )

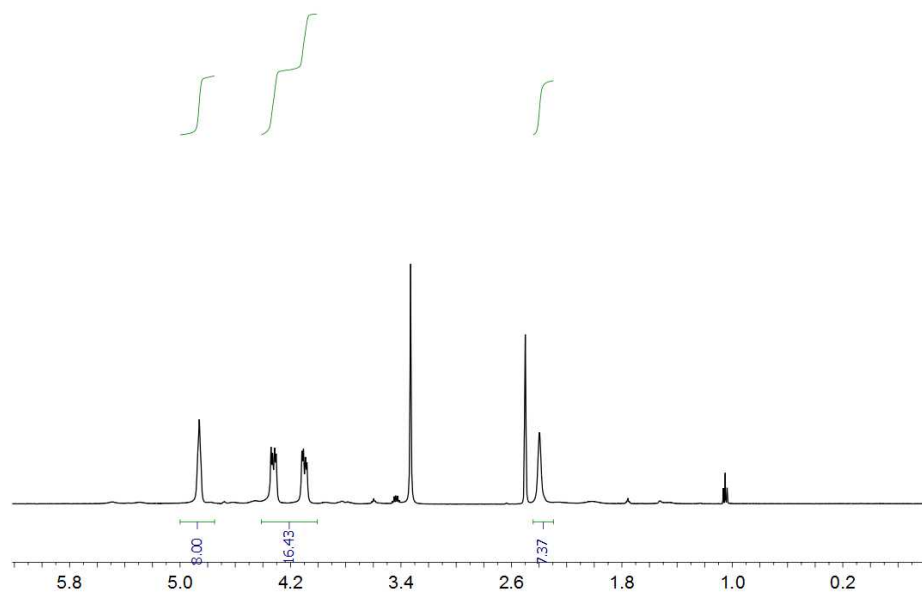

$^{31}\text{P}\{^1\text{H}\}$  NMR Spectrum of *trans*-Fe(DHMPE) $_2\text{Cl}_2$  (DMSO- $d_6$ )

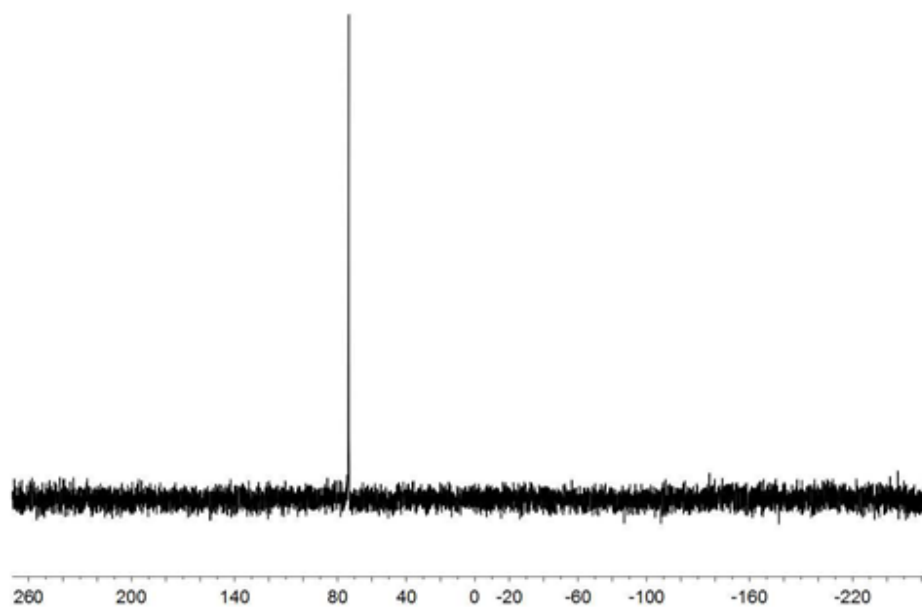

$^{13}\text{C}$  NMR Spectrum of *trans*-  $\text{Fe}(\text{DHMPe})_2\text{Cl}_2$  ( $\text{DMSO-}d_6$ )

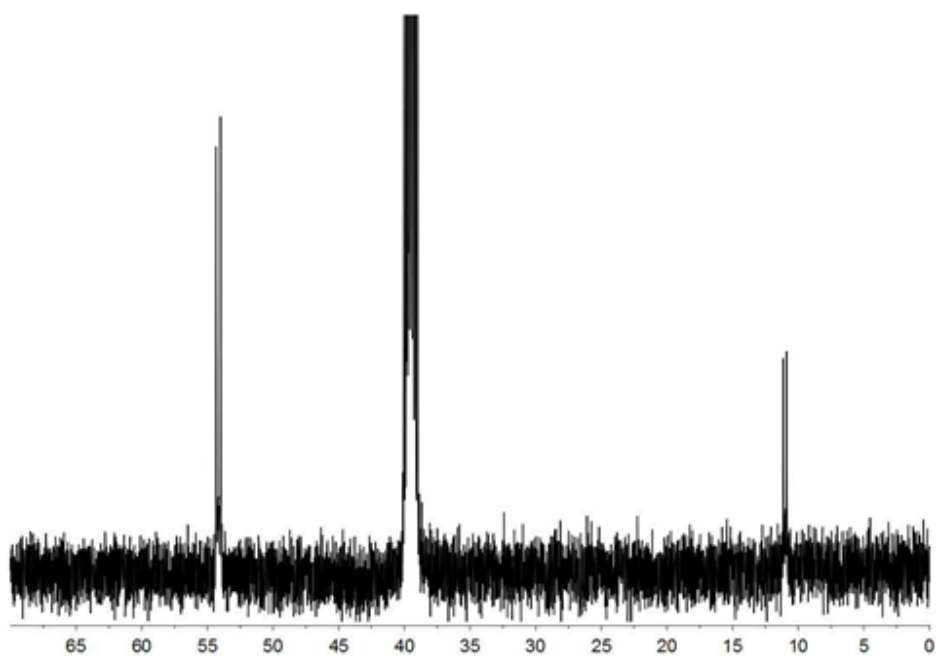

$^1\text{H}$  NMR Spectrum of DHMPE·2BH<sub>3</sub> (DMSO-*d*<sub>6</sub>)

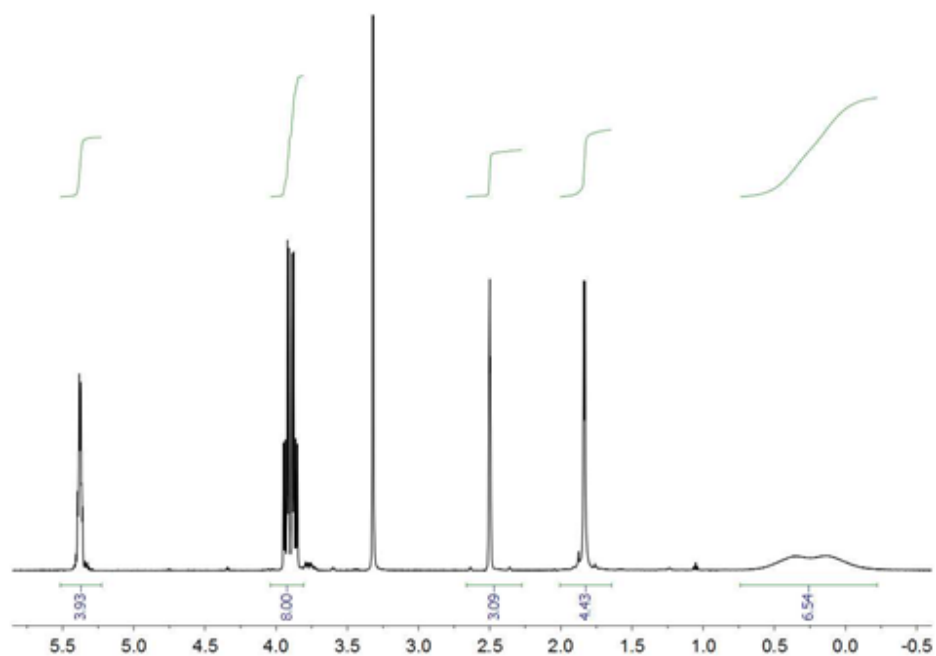

$^{31}\text{P}\{^1\text{H}\}$  NMR Spectrum of DHMPE·2BH<sub>3</sub> (DMSO-*d*<sub>6</sub>)

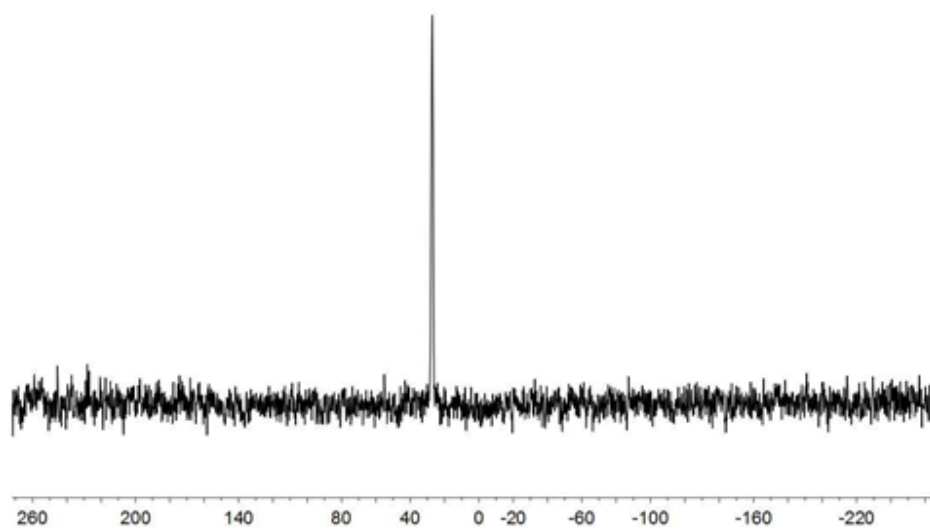

$^{13}\text{C}$  NMR Spectrum of DHMPE·2BH<sub>3</sub> (DMSO-*d*<sub>6</sub>)

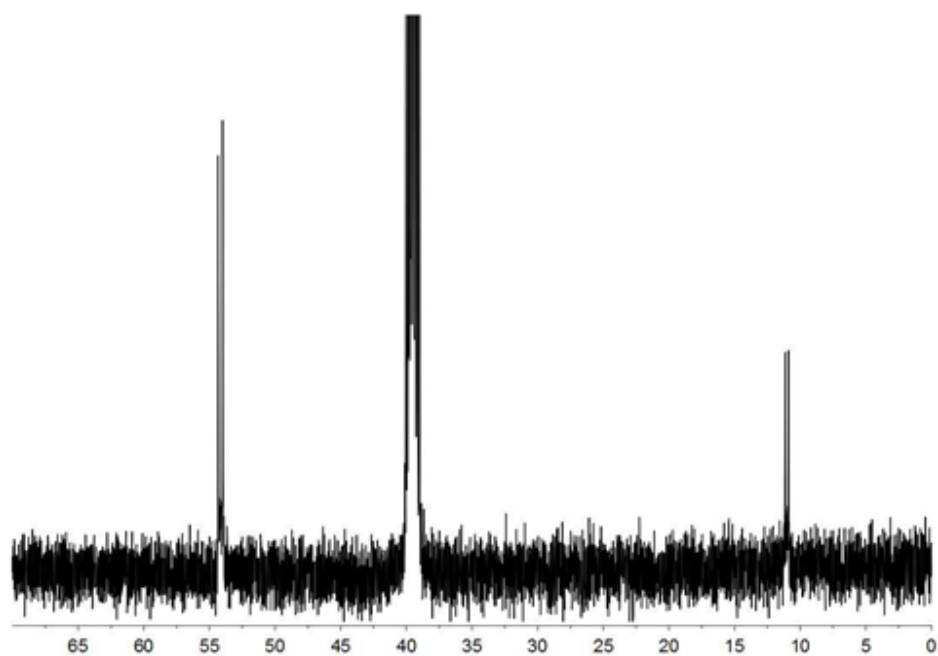

$^{11}\text{B}$  NMR Spectrum of DHMPE·2BH<sub>3</sub> (DMSO-*d*<sub>6</sub>)

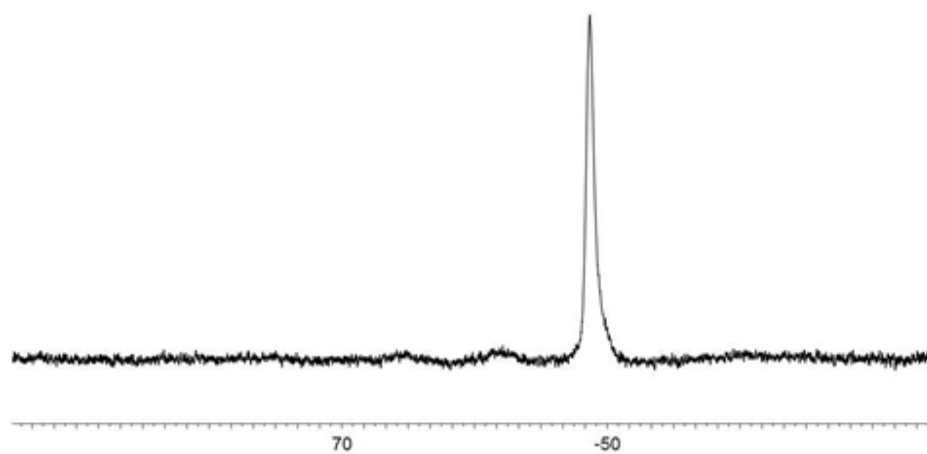

$^1\text{H}$  NMR Spectra of  $\text{Ph}_2\text{PCH}_2\text{OH} + \text{Et}_2\text{NH}$  (ethanol- $d_6$ )

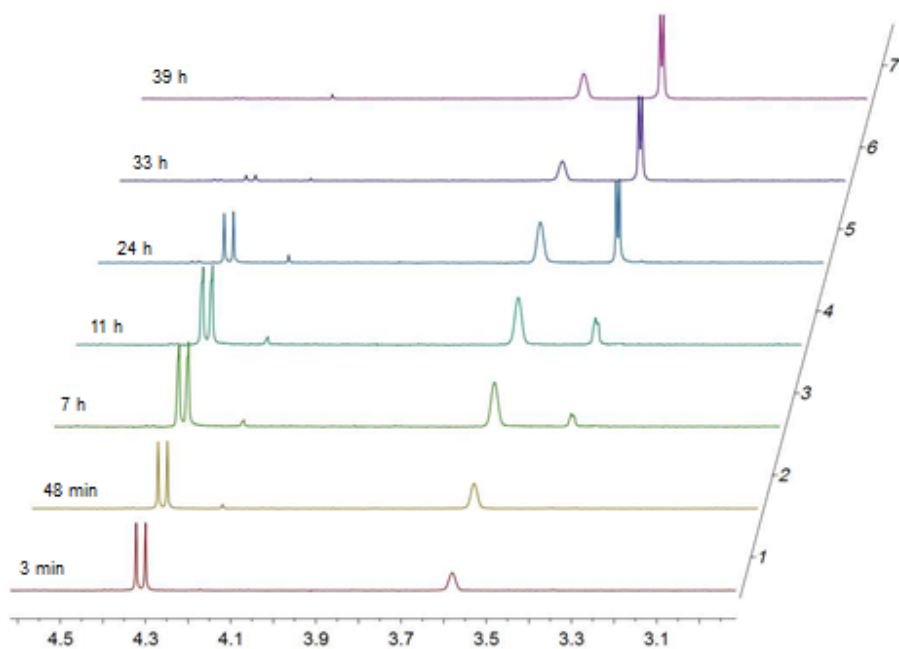

$^{31}\text{P}\{^1\text{H}\}$  NMR Spectra of  $\text{Ph}_2\text{PCH}_2\text{OH} + \text{Et}_2\text{NH}$  (ethanol- $d_6$ )

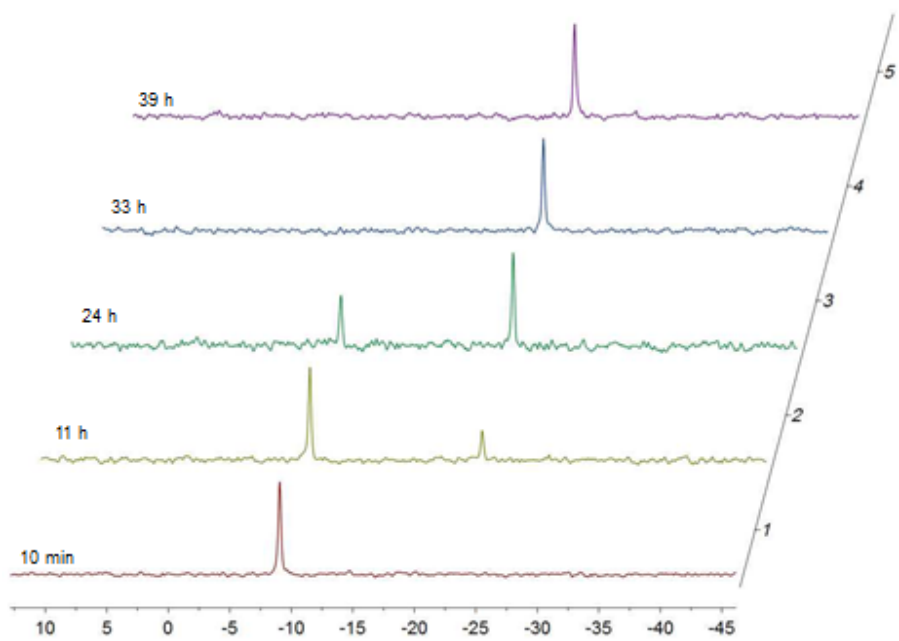

$^1\text{H}$  NMR Spectra of  $\text{Ph}_2\text{PCH}_2\text{OH}\cdot\text{BH}_3 + \text{Et}_2\text{NH}$  (ethanol- $d_6$ )

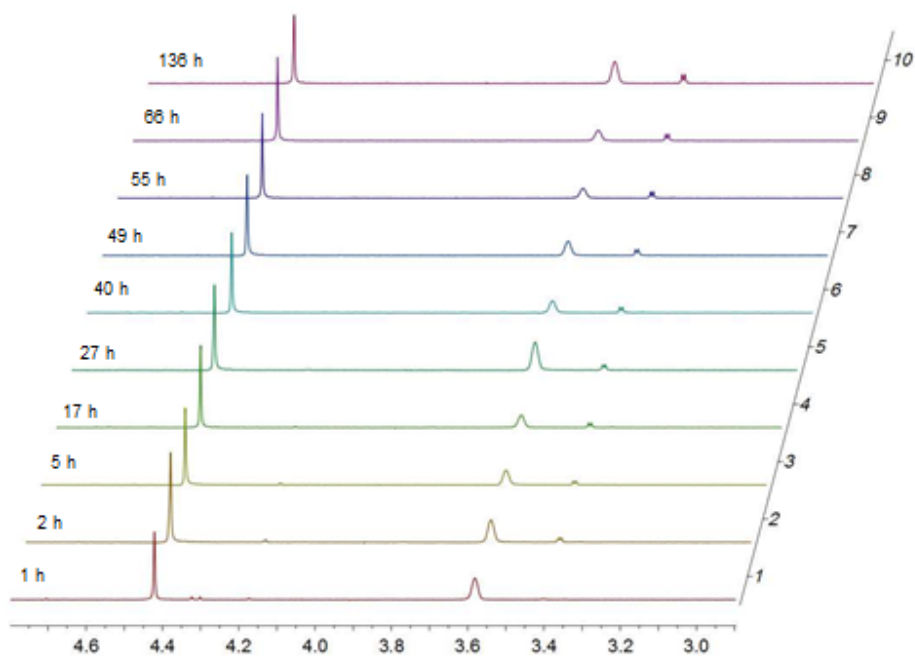

$^{31}\text{P}\{^1\text{H}\}$  NMR Spectra of  $\text{Ph}_2\text{PCH}_2\text{OH}\cdot\text{BH}_3 + \text{Et}_2\text{NH}$  (ethanol- $d_6$ )

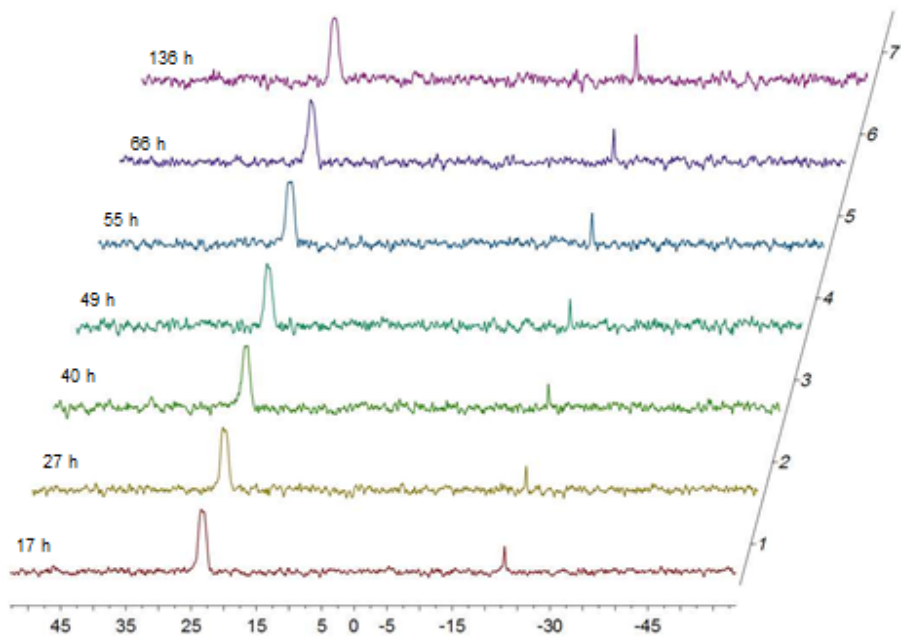

$^1\text{H}$  NMR Spectra of DHMPE + Et<sub>2</sub>NH (methanol-*d*<sub>4</sub>)

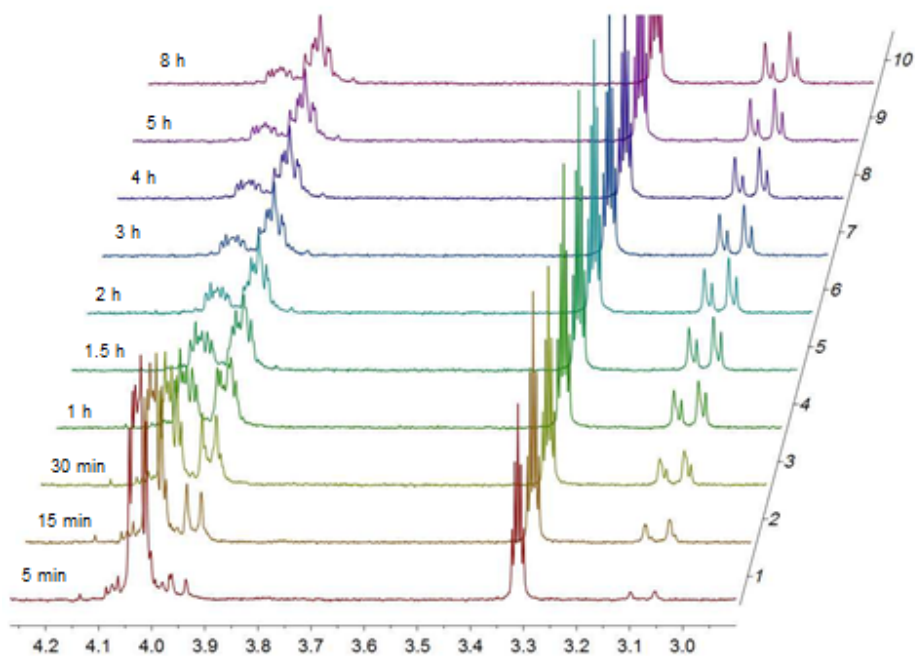

$^{31}\text{P}\{^1\text{H}\}$  NMR Spectra of DHMPE + Et<sub>2</sub>NH (methanol-*d*<sub>4</sub>)

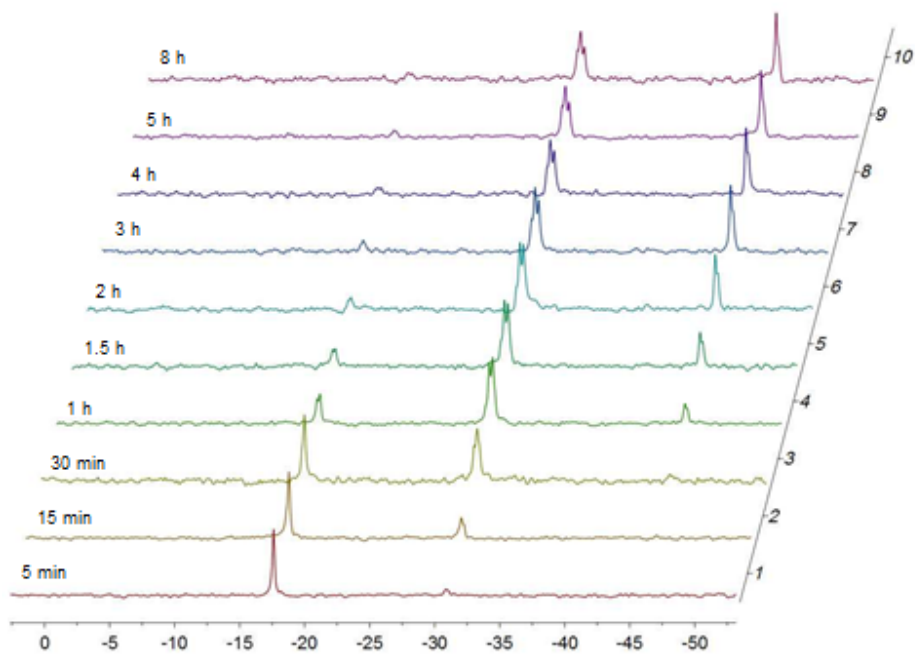



$^1\text{H}$  NMR Spectra of  $\text{DHMPE}\cdot 2\text{BH}_3 + \text{Et}_2\text{NH}$  (methanol- $d_4$ )

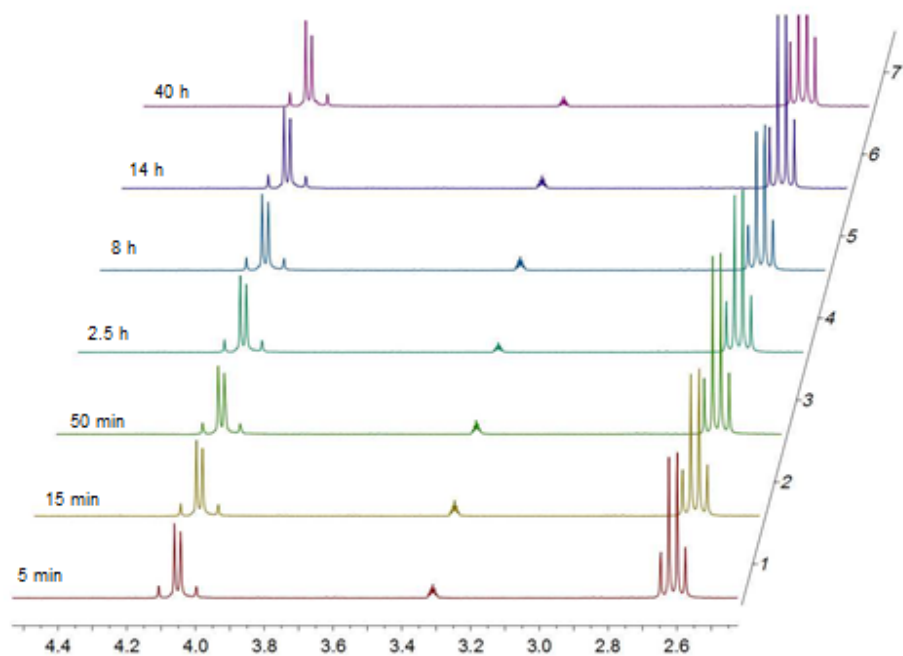

$^{31}\text{P}\{^1\text{H}\}$  NMR Spectra of  $\text{DHMPE}\cdot 2\text{BH}_3 + \text{Et}_2\text{NH}$  (methanol- $d_4$ )

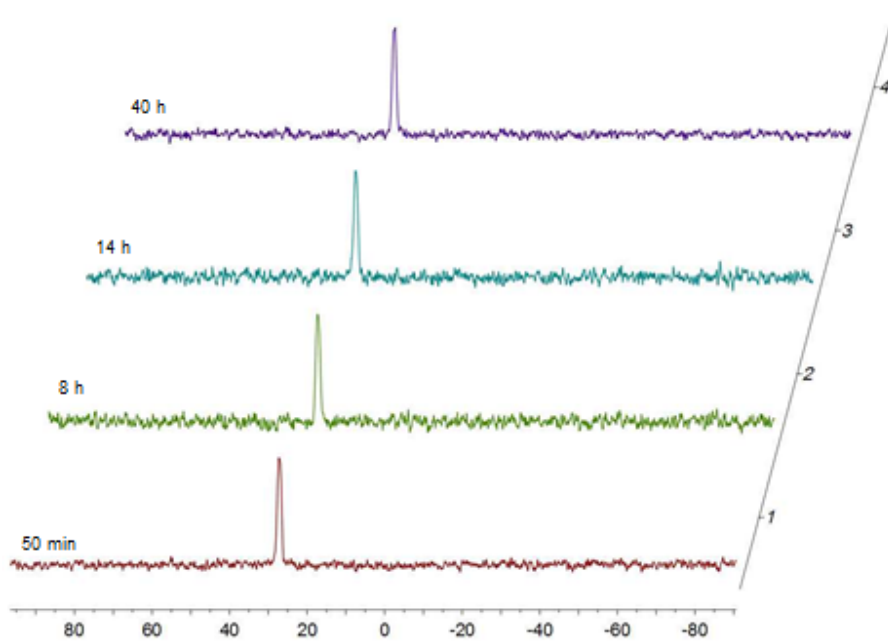

ESI-mass spectrum of  $\text{Fe}(\text{DHMPPE})_2\text{Cl}_2 + \text{BuNH}_2$

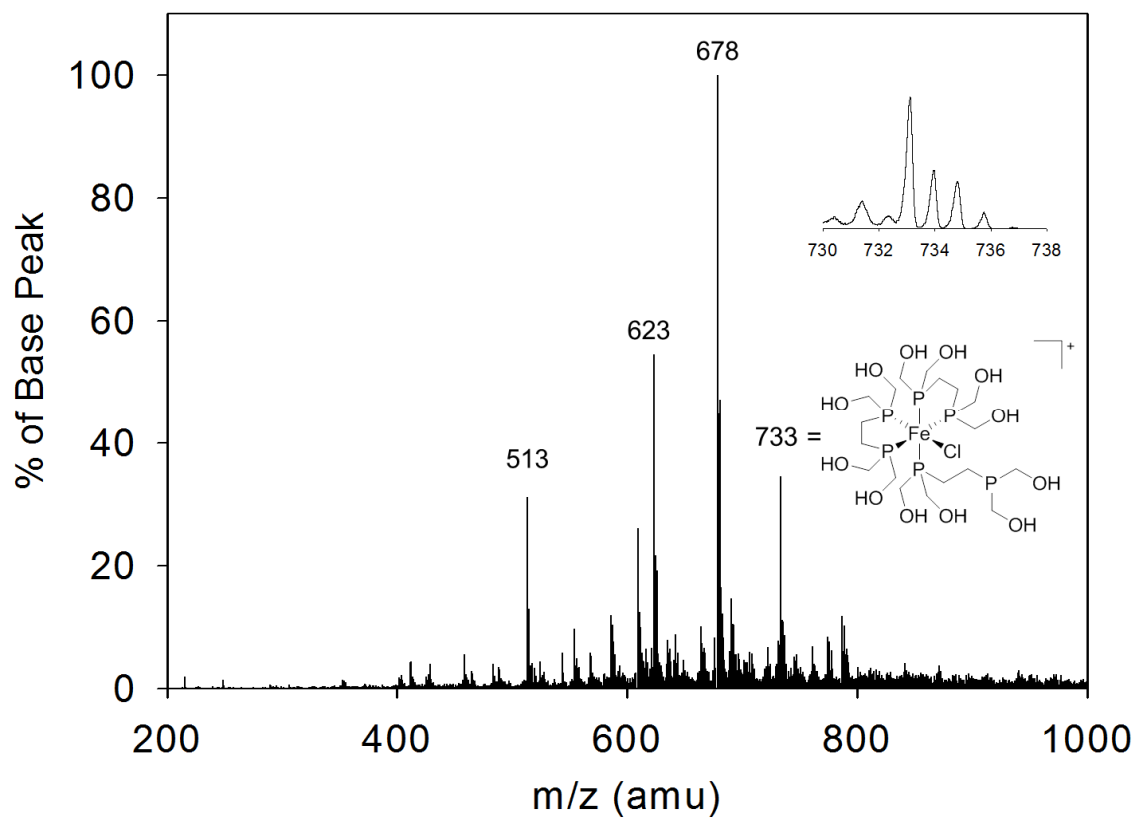

ESI-mass spectrum of  $[\text{Fe}(\text{DHMPPE})_3]^{2+}$

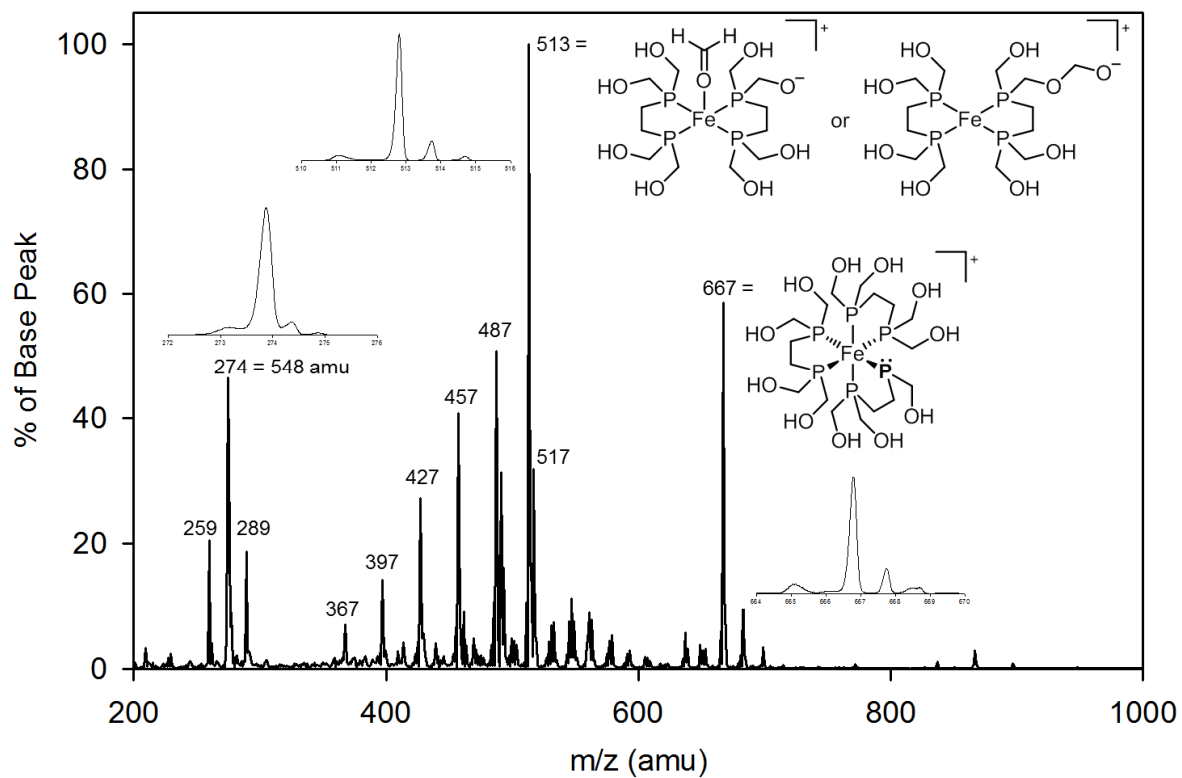

ESI-MS zoom scan of  $[\text{Fe}(\text{DHMPPE})_3]^{2+}$

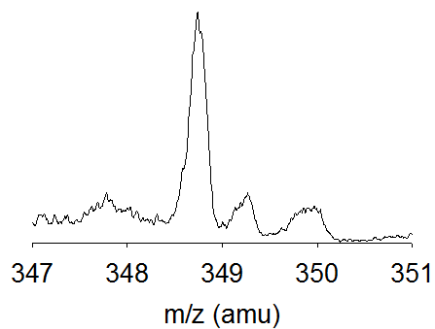

### Crystallographic Data for *trans*-Fe(DHMPE)<sub>2</sub>Cl<sub>2</sub>

Table 1. Crystal data and structure refinement for *trans*-Fe(DHMPE)<sub>2</sub>Cl<sub>2</sub>.

|                                   |                                                                                                |                   |
|-----------------------------------|------------------------------------------------------------------------------------------------|-------------------|
| Identification code               | char2                                                                                          |                   |
| Empirical formula                 | C <sub>24</sub> H <sub>64</sub> Cl <sub>4</sub> Fe <sub>2</sub> O <sub>16</sub> P <sub>8</sub> |                   |
| Formula weight                    | 1110.01                                                                                        |                   |
| Temperature                       | 173(2) K                                                                                       |                   |
| Wavelength                        | 0.71073 Å                                                                                      |                   |
| Crystal system                    | Monoclinic                                                                                     |                   |
| Space group                       | P2(1)/n                                                                                        |                   |
| Unit cell dimensions              | a = 7.7855(4) Å                                                                                | a = 90°.          |
|                                   | b = 13.0809(7) Å                                                                               | b = 92.3930(10)°. |
|                                   | c = 10.4136(6) Å                                                                               | g = 90°.          |
| Volume                            | 1059.61(10) Å <sup>3</sup>                                                                     |                   |
| Z                                 | 1                                                                                              |                   |
| Density (calculated)              | 1.740 Mg/m <sup>3</sup>                                                                        |                   |
| Absorption coefficient            | 1.303 mm <sup>-1</sup>                                                                         |                   |
| F(000)                            | 576                                                                                            |                   |
| Crystal size                      | 0.09 x 0.07 x 0.04 mm <sup>3</sup>                                                             |                   |
| Theta range for data collection   | 2.50 to 27.50°.                                                                                |                   |
| Index ranges                      | -10 ≤ h ≤ 9, -16 ≤ k ≤ 16, -13 ≤ l ≤ 13                                                        |                   |
| Reflections collected             | 11961                                                                                          |                   |
| Independent reflections           | 2428 [R(int) = 0.0494]                                                                         |                   |
| Completeness to theta = 27.50°    | 99.6 %                                                                                         |                   |
| Absorption correction             | Semi-empirical from equivalents                                                                |                   |
| Max. and min. transmission        | 0.9497 and 0.8917                                                                              |                   |
| Refinement method                 | Full-matrix least-squares on F <sup>2</sup>                                                    |                   |
| Data / restraints / parameters    | 2428 / 4 / 188                                                                                 |                   |
| Goodness-of-fit on F <sup>2</sup> | 1.115                                                                                          |                   |
| Final R indices [I > 2σ(I)]       | R1 = 0.0364, wR2 = 0.0761                                                                      |                   |
| R indices (all data)              | R1 = 0.0509, wR2 = 0.0831                                                                      |                   |
| Largest diff. peak and hole       | 0.482 and -0.328 e.Å <sup>-3</sup>                                                             |                   |

Table 2. Atomic coordinates ( $\times 10^4$ ) and equivalent isotropic displacement parameters ( $\text{\AA}^2 \times 10^3$ ) for *trans*-Fe(DHMPE)<sub>2</sub>Cl<sub>2</sub>. U(eq) is defined as one third of the trace of the orthogonalized U<sup>ij</sup> tensor.

|       | x        | y       | z       | U(eq) |
|-------|----------|---------|---------|-------|
| Fe(1) | 0        | 5000    | 5000    | 11(1) |
| Cl(1) | 2868(1)  | 5396(1) | 5646(1) | 17(1) |
| P(1)  | 535(1)   | 3321(1) | 5249(1) | 13(1) |
| P(2)  | -551(1)  | 4954(1) | 7085(1) | 13(1) |
| O(1)  | -584(3)  | 1348(1) | 4917(2) | 21(1) |
| O(2)  | 3966(3)  | 3175(2) | 5826(2) | 28(1) |
| O(3)  | -1116(3) | 6760(2) | 8188(2) | 24(1) |
| O(4)  | -2957(3) | 4722(2) | 8904(2) | 21(1) |
| C(1)  | 326(4)   | 2929(2) | 6945(3) | 18(1) |
| C(2)  | 568(4)   | 3855(2) | 7824(3) | 17(1) |
| C(3)  | -864(4)  | 2355(2) | 4436(3) | 18(1) |
| C(4)  | 2695(4)  | 2843(2) | 4892(3) | 20(1) |
| C(5)  | 126(4)   | 5960(2) | 8228(3) | 18(1) |
| C(6)  | -2790(4) | 4759(2) | 7543(3) | 18(1) |

Table 3. Bond lengths [Å] and angles [°] for *trans*-Fe(DHMPE)<sub>2</sub>Cl<sub>2</sub>.

---

|               |           |
|---------------|-----------|
| Fe(1)-P(2)#1  | 2.2312(7) |
| Fe(1)-P(2)    | 2.2312(7) |
| Fe(1)-P(1)#1  | 2.2484(7) |
| Fe(1)-P(1)    | 2.2484(7) |
| Fe(1)-Cl(1)   | 2.3626(6) |
| Fe(1)-Cl(1)#1 | 2.3626(6) |
| P(1)-C(4)     | 1.846(3)  |
| P(1)-C(3)     | 1.850(3)  |
| P(1)-C(1)     | 1.853(3)  |
| P(2)-C(2)     | 1.834(3)  |
| P(2)-C(5)     | 1.837(3)  |
| P(2)-C(6)     | 1.844(3)  |
| O(1)-C(3)     | 1.422(3)  |
| O(1)-H(1O)    | 0.879(18) |
| O(2)-C(4)     | 1.426(3)  |
| O(2)-H(2O)    | 0.906(18) |
| O(3)-C(5)     | 1.424(3)  |
| O(3)-H(3O)    | 0.935(19) |
| O(4)-C(6)     | 1.430(3)  |
| O(4)-H(4O)    | 0.899(18) |
| C(1)-C(2)     | 1.525(4)  |
| C(1)-H(1A)    | 0.97(3)   |
| C(1)-H(1B)    | 0.91(3)   |
| C(2)-H(2A)    | 1.03(3)   |
| C(2)-H(2B)    | 0.98(3)   |
| C(3)-H(3A)    | 0.95(3)   |
| C(3)-H(3B)    | 0.94(3)   |
| C(4)-H(4A)    | 0.94(3)   |
| C(4)-H(4B)    | 0.95(3)   |
| C(5)-H(5A)    | 0.96(3)   |
| C(5)-H(5B)    | 0.98(3)   |
| C(6)-H(6A)    | 0.91(3)   |
| C(6)-H(6B)    | 0.96(3)   |

|                      |            |
|----------------------|------------|
| P(2)#1-Fe(1)-P(2)    | 180.0      |
| P(2)#1-Fe(1)-P(1)#1  | 84.48(2)   |
| P(2)-Fe(1)-P(1)#1    | 95.52(2)   |
| P(2)#1-Fe(1)-P(1)    | 95.52(2)   |
| P(2)-Fe(1)-P(1)      | 84.48(2)   |
| P(1)#1-Fe(1)-P(1)    | 180.00(3)  |
| P(2)#1-Fe(1)-Cl(1)   | 93.07(2)   |
| P(2)-Fe(1)-Cl(1)     | 86.93(2)   |
| P(1)#1-Fe(1)-Cl(1)   | 89.27(2)   |
| P(1)-Fe(1)-Cl(1)     | 90.73(2)   |
| P(2)#1-Fe(1)-Cl(1)#1 | 86.93(2)   |
| P(2)-Fe(1)-Cl(1)#1   | 93.07(2)   |
| P(1)#1-Fe(1)-Cl(1)#1 | 90.73(2)   |
| P(1)-Fe(1)-Cl(1)#1   | 89.27(2)   |
| Cl(1)-Fe(1)-Cl(1)#1  | 180.0      |
| C(4)-P(1)-C(3)       | 101.55(14) |
| C(4)-P(1)-C(1)       | 102.43(14) |
| C(3)-P(1)-C(1)       | 99.99(14)  |
| C(4)-P(1)-Fe(1)      | 118.24(10) |
| C(3)-P(1)-Fe(1)      | 120.80(9)  |
| C(1)-P(1)-Fe(1)      | 110.92(9)  |
| C(2)-P(2)-C(5)       | 99.86(13)  |
| C(2)-P(2)-C(6)       | 102.74(13) |
| C(5)-P(2)-C(6)       | 100.39(13) |
| C(2)-P(2)-Fe(1)      | 108.80(9)  |
| C(5)-P(2)-Fe(1)      | 123.35(10) |
| C(6)-P(2)-Fe(1)      | 118.52(10) |
| C(3)-O(1)-H(10)      | 107(2)     |
| C(4)-O(2)-H(20)      | 107(2)     |
| C(5)-O(3)-H(30)      | 104(2)     |
| C(6)-O(4)-H(40)      | 109(2)     |
| C(2)-C(1)-P(1)       | 109.82(19) |
| C(2)-C(1)-H(1A)      | 112.0(16)  |
| P(1)-C(1)-H(1A)      | 108.2(16)  |
| C(2)-C(1)-H(1B)      | 110.9(18)  |
| P(1)-C(1)-H(1B)      | 101.9(17)  |

|                  |            |
|------------------|------------|
| H(1A)-C(1)-H(1B) | 113(2)     |
| C(1)-C(2)-P(2)   | 109.0(2)   |
| C(1)-C(2)-H(2A)  | 111.7(16)  |
| P(2)-C(2)-H(2A)  | 104.9(16)  |
| C(1)-C(2)-H(2B)  | 111.3(17)  |
| P(2)-C(2)-H(2B)  | 110.2(16)  |
| H(2A)-C(2)-H(2B) | 110(2)     |
| O(1)-C(3)-P(1)   | 113.16(19) |
| O(1)-C(3)-H(3A)  | 106(2)     |
| P(1)-C(3)-H(3A)  | 106(2)     |
| O(1)-C(3)-H(3B)  | 109.9(17)  |
| P(1)-C(3)-H(3B)  | 109.7(17)  |
| H(3A)-C(3)-H(3B) | 112(3)     |
| O(2)-C(4)-P(1)   | 111.8(2)   |
| O(2)-C(4)-H(4A)  | 109.8(16)  |
| P(1)-C(4)-H(4A)  | 111.1(16)  |
| O(2)-C(4)-H(4B)  | 106.6(16)  |
| P(1)-C(4)-H(4B)  | 110.0(16)  |
| H(4A)-C(4)-H(4B) | 107(2)     |
| O(3)-C(5)-P(2)   | 109.32(19) |
| O(3)-C(5)-H(5A)  | 110.7(18)  |
| P(2)-C(5)-H(5A)  | 106.8(18)  |
| O(3)-C(5)-H(5B)  | 111.2(18)  |
| P(2)-C(5)-H(5B)  | 109.6(17)  |
| H(5A)-C(5)-H(5B) | 109(2)     |
| O(4)-C(6)-P(2)   | 112.8(2)   |
| O(4)-C(6)-H(6A)  | 111.9(18)  |
| P(2)-C(6)-H(6A)  | 107.4(18)  |
| O(4)-C(6)-H(6B)  | 108.2(18)  |
| P(2)-C(6)-H(6B)  | 106.8(18)  |
| H(6A)-C(6)-H(6B) | 110(3)     |

---

Symmetry transformations used to generate equivalent atoms:

#1 -x,-y+1,-z+1



Table 4. Anisotropic displacement parameters ( $\text{\AA}^2 \times 10^3$ ) for *trans*-Fe(DHMPE)<sub>2</sub>Cl<sub>2</sub>. The anisotropic displacement factor exponent takes the form:  $-2p^2 [ h^2 a^* 2U^{11} + \dots + 2 h k a^* b^* U^{12} ]$

|       | U <sup>11</sup> | U <sup>22</sup> | U <sup>33</sup> | U <sup>23</sup> | U <sup>13</sup> | U <sup>12</sup> |
|-------|-----------------|-----------------|-----------------|-----------------|-----------------|-----------------|
| Fe(1) | 12(1)           | 10(1)           | 11(1)           | 0(1)            | 1(1)            | 0(1)            |
| Cl(1) | 13(1)           | 16(1)           | 22(1)           | -1(1)           | 0(1)            | -1(1)           |
| P(1)  | 14(1)           | 11(1)           | 13(1)           | 0(1)            | 2(1)            | 1(1)            |
| P(2)  | 15(1)           | 12(1)           | 12(1)           | 0(1)            | 2(1)            | 0(1)            |
| O(1)  | 23(1)           | 11(1)           | 29(1)           | 0(1)            | 10(1)           | 2(1)            |
| O(2)  | 20(1)           | 18(1)           | 45(1)           | 4(1)            | -10(1)          | 2(1)            |
| O(3)  | 22(1)           | 18(1)           | 33(1)           | -9(1)           | 0(1)            | 1(1)            |
| O(4)  | 28(1)           | 16(1)           | 20(1)           | -1(1)           | 12(1)           | -2(1)           |
| C(1)  | 21(2)           | 16(1)           | 17(1)           | 3(1)            | 3(1)            | 1(1)            |
| C(2)  | 23(2)           | 16(1)           | 13(1)           | 2(1)            | 3(1)            | 2(1)            |
| C(3)  | 21(2)           | 12(1)           | 20(2)           | -2(1)           | 1(1)            | -2(1)           |
| C(4)  | 20(2)           | 17(2)           | 22(2)           | 4(1)            | 4(1)            | 4(1)            |
| C(5)  | 23(2)           | 16(1)           | 14(1)           | -2(1)           | 1(1)            | -1(1)           |
| C(6)  | 21(2)           | 14(1)           | 19(2)           | 2(1)            | 5(1)            | -1(1)           |

Table 5. Hydrogen coordinates ( $\times 10^4$ ) and isotropic displacement parameters ( $\text{\AA}^2 \times 10^3$ )  
for *trans*-Fe(DHMPE)<sub>2</sub>Cl<sub>2</sub>.

|       | x         | y        | z        | U(eq)  |
|-------|-----------|----------|----------|--------|
| H(1O) | 330(30)   | 1110(30) | 4550(30) | 45(11) |
| H(2O) | 4010(40)  | 3867(14) | 5780(30) | 39(10) |
| H(3O) | -540(50)  | 7310(20) | 8580(40) | 68(13) |
| H(4O) | -3080(50) | 5360(17) | 9210(30) | 51(12) |
| H(1A) | 1170(30)  | 2400(20) | 7140(30) | 15(7)  |
| H(1B) | -780(40)  | 2700(20) | 6940(30) | 16(8)  |
| H(2A) | 1830(40)  | 4070(20) | 7910(30) | 27(8)  |
| H(2B) | 130(30)   | 3720(20) | 8670(30) | 15(7)  |
| H(3A) | -2000(40) | 2530(30) | 4630(30) | 39(10) |
| H(3B) | -700(30)  | 2370(20) | 3550(30) | 18(8)  |
| H(4A) | 3010(30)  | 3050(20) | 4070(30) | 13(7)  |
| H(4B) | 2710(30)  | 2120(20) | 4910(20) | 11(7)  |
| H(5A) | 200(40)   | 5650(20) | 9060(30) | 21(8)  |
| H(5B) | 1270(40)  | 6220(20) | 8020(30) | 25(8)  |
| H(6A) | -3430(40) | 5270(20) | 7170(30) | 17(8)  |
| H(6B) | -3150(40) | 4110(20) | 7190(30) | 25(8)  |

Table 6. Torsion angles [°] for *trans*-Fe(DHMPE)<sub>2</sub>Cl<sub>2</sub>.

---

|                         |             |
|-------------------------|-------------|
| P(2)#1-Fe(1)-P(1)-C(4)  | 59.41(11)   |
| P(2)-Fe(1)-P(1)-C(4)    | -120.59(11) |
| P(1)#1-Fe(1)-P(1)-C(4)  | -31(100)    |
| Cl(1)-Fe(1)-P(1)-C(4)   | -33.74(11)  |
| Cl(1)#1-Fe(1)-P(1)-C(4) | 146.26(11)  |
| P(2)#1-Fe(1)-P(1)-C(3)  | -66.38(12)  |
| P(2)-Fe(1)-P(1)-C(3)    | 113.62(12)  |
| P(1)#1-Fe(1)-P(1)-C(3)  | -157(100)   |
| Cl(1)-Fe(1)-P(1)-C(3)   | -159.53(12) |
| Cl(1)#1-Fe(1)-P(1)-C(3) | 20.47(12)   |
| P(2)#1-Fe(1)-P(1)-C(1)  | 177.25(11)  |
| P(2)-Fe(1)-P(1)-C(1)    | -2.75(11)   |
| P(1)#1-Fe(1)-P(1)-C(1)  | 87(100)     |
| Cl(1)-Fe(1)-P(1)-C(1)   | 84.10(11)   |
| Cl(1)#1-Fe(1)-P(1)-C(1) | -95.90(11)  |
| P(2)#1-Fe(1)-P(2)-C(2)  | -159(100)   |
| P(1)#1-Fe(1)-P(2)-C(2)  | -156.76(10) |
| P(1)-Fe(1)-P(2)-C(2)    | 23.24(10)   |
| Cl(1)-Fe(1)-P(2)-C(2)   | -67.79(10)  |
| Cl(1)#1-Fe(1)-P(2)-C(2) | 112.21(10)  |
| P(2)#1-Fe(1)-P(2)-C(5)  | -43(100)    |
| P(1)#1-Fe(1)-P(2)-C(5)  | -40.62(12)  |
| P(1)-Fe(1)-P(2)-C(5)    | 139.38(12)  |
| Cl(1)-Fe(1)-P(2)-C(5)   | 48.35(11)   |
| Cl(1)#1-Fe(1)-P(2)-C(5) | -131.65(11) |
| P(2)#1-Fe(1)-P(2)-C(6)  | 85(100)     |
| P(1)#1-Fe(1)-P(2)-C(6)  | 86.49(11)   |
| P(1)-Fe(1)-P(2)-C(6)    | -93.51(11)  |
| Cl(1)-Fe(1)-P(2)-C(6)   | 175.46(11)  |
| Cl(1)#1-Fe(1)-P(2)-C(6) | -4.54(11)   |
| C(4)-P(1)-C(1)-C(2)     | 104.2(2)    |
| C(3)-P(1)-C(1)-C(2)     | -151.5(2)   |
| Fe(1)-P(1)-C(1)-C(2)    | -22.8(2)    |
| P(1)-C(1)-C(2)-P(2)     | 41.2(2)     |

|                      |             |
|----------------------|-------------|
| C(5)-P(2)-C(2)-C(1)  | -174.4(2)   |
| C(6)-P(2)-C(2)-C(1)  | 82.5(2)     |
| Fe(1)-P(2)-C(2)-C(1) | -44.0(2)    |
| C(4)-P(1)-C(3)-O(1)  | 60.1(2)     |
| C(1)-P(1)-C(3)-O(1)  | -44.9(2)    |
| Fe(1)-P(1)-C(3)-O(1) | -166.69(15) |
| C(3)-P(1)-C(4)-O(2)  | -154.9(2)   |
| C(1)-P(1)-C(4)-O(2)  | -51.9(2)    |
| Fe(1)-P(1)-C(4)-O(2) | 70.4(2)     |
| C(2)-P(2)-C(5)-O(3)  | -154.9(2)   |
| C(6)-P(2)-C(5)-O(3)  | -49.8(2)    |
| Fe(1)-P(2)-C(5)-O(3) | 84.7(2)     |
| C(2)-P(2)-C(6)-O(4)  | 58.7(2)     |
| C(5)-P(2)-C(6)-O(4)  | -44.0(2)    |
| Fe(1)-P(2)-C(6)-O(4) | 178.62(15)  |

Symmetry transformations used to generate equivalent atoms:

#1 -x,-y+1,-z+1

Table 7. Hydrogen bonds for *trans*-Fe(DHMPE)<sub>2</sub>Cl<sub>2</sub> [Å and °].

| D-H...A             | d(D-H)    | d(H...A) | d(D...A) | <(DHA) |
|---------------------|-----------|----------|----------|--------|
| O(3)-H(3O)...O(2)#2 | 0.935(19) | 1.76(2)  | 2.673(3) | 164(4) |
| O(2)-H(2O)...Cl(1)  | 0.906(18) | 2.19(2)  | 3.031(2) | 154(3) |
| O(1)-H(1O)...O(4)#3 | 0.879(18) | 1.87(2)  | 2.726(3) | 165(3) |
| O(4)-H(4O)...O(1)#4 | 0.899(18) | 1.91(2)  | 2.728(3) | 149(3) |
| O(4)-H(4O)...O(3)   | 0.899(18) | 2.64(3)  | 3.132(3) | 116(3) |

Symmetry transformations used to generate equivalent atoms:

#1 -x,-y+1,-z+1 #2 -x+1/2,y+1/2,-z+3/2 #3 x+1/2,-y+1/2,z-1/2

#4 -x-1/2,y+1/2,-z+3/2

## Crystallographic Data for DHMPE·2BH<sub>3</sub>

Table 8. Crystal data and structure refinement for DHMPE·2BH<sub>3</sub>.

|                                   |                                                                             |                  |
|-----------------------------------|-----------------------------------------------------------------------------|------------------|
| Identification code               | char5                                                                       |                  |
| Empirical formula                 | C <sub>6</sub> H <sub>22</sub> B <sub>2</sub> O <sub>4</sub> P <sub>2</sub> |                  |
| Formula weight                    | 241.80                                                                      |                  |
| Temperature                       | 173(2) K                                                                    |                  |
| Wavelength                        | 0.71073 Å                                                                   |                  |
| Crystal system                    | Monoclinic                                                                  |                  |
| Space group                       | C2/c                                                                        |                  |
| Unit cell dimensions              | a = 18.092(3) Å                                                             | a = 90°.         |
|                                   | b = 6.2042(11) Å                                                            | b = 100.688(3)°. |
|                                   | c = 11.757(2) Å                                                             | g = 90°.         |
| Volume                            | 1296.8(4) Å <sup>3</sup>                                                    |                  |
| Z                                 | 4                                                                           |                  |
| Density (calculated)              | 1.238 Mg/m <sup>3</sup>                                                     |                  |
| Absorption coefficient            | 0.323 mm <sup>-1</sup>                                                      |                  |
| F(000)                            | 520                                                                         |                  |
| Crystal size                      | 0.27 x 0.12 x 0.02 mm <sup>3</sup>                                          |                  |
| Theta range for data collection   | 2.29 to 27.00°.                                                             |                  |
| Index ranges                      | -22 ≤ h ≤ 22, -7 ≤ k ≤ 7, -14 ≤ l ≤ 15                                      |                  |
| Reflections collected             | 6768                                                                        |                  |
| Independent reflections           | 1408 [R(int) = 0.0549]                                                      |                  |
| Completeness to theta = 27.00°    | 100.0 %                                                                     |                  |
| Absorption correction             | Semi-empirical from equivalents                                             |                  |
| Max. and min. transmission        | 0.9936 and 0.9179                                                           |                  |
| Refinement method                 | Full-matrix least-squares on F <sup>2</sup>                                 |                  |
| Data / restraints / parameters    | 1408 / 2 / 108                                                              |                  |
| Goodness-of-fit on F <sup>2</sup> | 1.077                                                                       |                  |
| Final R indices [I > 2σ(I)]       | R1 = 0.0495, wR2 = 0.1148                                                   |                  |
| R indices (all data)              | R1 = 0.0642, wR2 = 0.1245                                                   |                  |
| Largest diff. peak and hole       | 1.155 and -0.301 e.Å <sup>-3</sup>                                          |                  |

Table 9. Atomic coordinates ( $\times 10^4$ ) and equivalent isotropic displacement parameters ( $\text{\AA}^2 \times 10^3$ ) for DHMPE·2BH<sub>3</sub>. U(eq) is defined as one third of the trace of the orthogonalized U<sup>ij</sup> tensor.

|      | x       | y        | z        | U(eq) |
|------|---------|----------|----------|-------|
| P(1) | 3940(1) | 1883(1)  | 9624(1)  | 19(1) |
| O(1) | 2934(1) | 4245(3)  | 8185(1)  | 27(1) |
| O(2) | 3126(1) | -1572(3) | 8685(2)  | 32(1) |
| B(1) | 4048(2) | 3741(5)  | 10936(3) | 29(1) |
| C(1) | 3635(2) | 3192(4)  | 8220(2)  | 26(1) |
| C(2) | 3235(2) | -200(4)  | 9667(2)  | 25(1) |
| C(3) | 4789(1) | 479(4)   | 9433(2)  | 23(1) |

Table 10. Bond lengths [Å] and angles [°] for DHMPE·2BH<sub>3</sub>.

---

|                  |            |
|------------------|------------|
| P(1)-C(3)        | 1.816(2)   |
| P(1)-C(2)        | 1.823(3)   |
| P(1)-C(1)        | 1.830(3)   |
| P(1)-B(1)        | 1.907(3)   |
| O(1)-C(1)        | 1.420(3)   |
| O(1)-H(1O)       | 0.908(17)  |
| O(2)-C(2)        | 1.419(3)   |
| O(2)-H(2O)       | 0.913(18)  |
| B(1)-H(1B)       | 1.13(4)    |
| B(1)-H(2B)       | 1.16(3)    |
| B(1)-H(3B)       | 1.08(3)    |
| C(1)-H(1A)       | 0.92(3)    |
| C(1)-H(1C)       | 0.99(3)    |
| C(2)-H(2A)       | 0.96(3)    |
| C(2)-H(2C)       | 0.94(3)    |
| C(3)-C(3)#1      | 1.529(5)   |
| C(3)-H(3A)       | 0.96(3)    |
| C(3)-H(3C)       | 0.89(3)    |
|                  |            |
| C(3)-P(1)-C(2)   | 105.99(13) |
| C(3)-P(1)-C(1)   | 102.83(12) |
| C(2)-P(1)-C(1)   | 104.13(13) |
| C(3)-P(1)-B(1)   | 115.33(13) |
| C(2)-P(1)-B(1)   | 111.93(13) |
| C(1)-P(1)-B(1)   | 115.46(14) |
| C(1)-O(1)-H(1O)  | 109.7(15)  |
| C(2)-O(2)-H(2O)  | 111(2)     |
| P(1)-B(1)-H(1B)  | 101.2(19)  |
| P(1)-B(1)-H(2B)  | 106.9(16)  |
| H(1B)-B(1)-H(2B) | 116(3)     |
| P(1)-B(1)-H(3B)  | 107.2(17)  |
| H(1B)-B(1)-H(3B) | 116(3)     |
| H(2B)-B(1)-H(3B) | 109(2)     |
| O(1)-C(1)-P(1)   | 110.42(18) |

|                   |            |
|-------------------|------------|
| O(1)-C(1)-H(1A)   | 109.5(17)  |
| P(1)-C(1)-H(1A)   | 108.2(17)  |
| O(1)-C(1)-H(1C)   | 109.2(17)  |
| P(1)-C(1)-H(1C)   | 104.0(16)  |
| H(1A)-C(1)-H(1C)  | 115(2)     |
| O(2)-C(2)-P(1)    | 113.25(18) |
| O(2)-C(2)-H(2A)   | 107.4(17)  |
| P(1)-C(2)-H(2A)   | 107.9(17)  |
| O(2)-C(2)-H(2C)   | 111.2(18)  |
| P(1)-C(2)-H(2C)   | 108.8(18)  |
| H(2A)-C(2)-H(2C)  | 108(2)     |
| C(3)#1-C(3)-P(1)  | 112.1(2)   |
| C(3)#1-C(3)-H(3A) | 110.3(18)  |
| P(1)-C(3)-H(3A)   | 105.0(17)  |
| C(3)#1-C(3)-H(3C) | 108.9(16)  |
| P(1)-C(3)-H(3C)   | 109.4(15)  |
| H(3A)-C(3)-H(3C)  | 111(2)     |

---

Symmetry transformations used to generate equivalent atoms:

#1 -x+1,-y,-z+2



Table 11. Anisotropic displacement parameters ( $\text{\AA}^2 \times 10^3$ ) for DHMPE·2BH<sub>3</sub>. The anisotropic displacement factor exponent takes the form:  $-2p^2 [ h^2 a^2 U^{11} + \dots + 2 h k a^* b^* U^{12} ]$

|      | U <sup>11</sup> | U <sup>22</sup> | U <sup>33</sup> | U <sup>23</sup> | U <sup>13</sup> | U <sup>12</sup> |
|------|-----------------|-----------------|-----------------|-----------------|-----------------|-----------------|
| P(1) | 20(1)           | 17(1)           | 19(1)           | 0(1)            | 0(1)            | 2(1)            |
| O(1) | 28(1)           | 19(1)           | 30(1)           | -1(1)           | -7(1)           | 4(1)            |
| O(2) | 36(1)           | 20(1)           | 33(1)           | -4(1)           | -12(1)          | 0(1)            |
| B(1) | 32(2)           | 26(2)           | 27(2)           | -6(1)           | 1(1)            | 3(1)            |
| C(1) | 30(2)           | 24(1)           | 23(1)           | 2(1)            | 0(1)            | 2(1)            |
| C(2) | 24(1)           | 21(1)           | 28(1)           | 1(1)            | 1(1)            | 0(1)            |
| C(3) | 23(1)           | 24(1)           | 21(1)           | -1(1)           | 2(1)            | 4(1)            |

Table 12. Hydrogen coordinates ( $\times 10^4$ ) and isotropic displacement parameters ( $\text{\AA}^2 \times 10^3$ ) for DHMPE·2BH<sub>3</sub>.

|       | x        | y         | z         | U(eq)  |
|-------|----------|-----------|-----------|--------|
| H(1O) | 3013(13) | 5640(30)  | 8400(20)  | 23(7)  |
| H(2O) | 2741(15) | -1080(60) | 8130(20)  | 67(11) |
| H(1B) | 4080(20) | 2530(60)  | 11670(30) | 72(11) |
| H(2B) | 3527(18) | 4860(50)  | 10800(30) | 59(10) |
| H(3B) | 4544(19) | 4720(60)  | 10930(30) | 60(10) |
| H(1A) | 3992(16) | 4190(50)  | 8120(20)  | 35(8)  |
| H(1C) | 3567(16) | 1990(50)  | 7660(20)  | 41(8)  |
| H(2A) | 3404(15) | -1080(50) | 10330(20) | 33(7)  |
| H(2C) | 2782(17) | 460(50)   | 9760(20)  | 40(8)  |
| H(3A) | 5092(17) | 1560(50)  | 9150(20)  | 39(8)  |
| H(3C) | 4669(13) | -580(40)  | 8920(20)  | 15(6)  |

Table 13. Torsion angles [°] for DHMPE·2BH<sub>3</sub>.

|                       |            |
|-----------------------|------------|
| C(3)-P(1)-C(1)-O(1)   | 175.43(18) |
| C(2)-P(1)-C(1)-O(1)   | 65.0(2)    |
| B(1)-P(1)-C(1)-O(1)   | -58.1(2)   |
| C(3)-P(1)-C(2)-O(2)   | -55.2(2)   |
| C(1)-P(1)-C(2)-O(2)   | 52.9(2)    |
| B(1)-P(1)-C(2)-O(2)   | 178.29(18) |
| C(2)-P(1)-C(3)-C(3)#1 | -79.3(3)   |
| C(1)-P(1)-C(3)-C(3)#1 | 171.6(3)   |
| B(1)-P(1)-C(3)-C(3)#1 | 45.1(3)    |

Symmetry transformations used to generate equivalent atoms:

#1 -x+1,-y,-z+2

Table 14. Hydrogen bonds for DHMPE·2BH<sub>3</sub> [Å and °].

| D-H...A             | d(D-H)    | d(H...A)  | d(D...A) | ∠(DHA) |
|---------------------|-----------|-----------|----------|--------|
| O(1)-H(1O)...O(2)#2 | 0.908(17) | 1.764(17) | 2.670(2) | 174(2) |
| O(2)-H(2O)...O(1)#3 | 0.913(18) | 1.80(2)   | 2.684(2) | 163(3) |

Symmetry transformations used to generate equivalent atoms:

#1 -x+1,-y,-z+2 #2 x,y+1,z #3 -x+1/2,y-1/2,-z+3/2
